# Supplementary material
Source: PubMed Central journal article supplement (PMC6421248)
Supplement: 827446_Supplemental_Material.pdf [file 827446_Supplemental_Material.pdf]

## Supplemental Data

1 Search Strategy in Medline (Wolters Kluwer, Ovid)

2

3 MEDLINE 1990 to November Week 3 2017,

4 MEDLINE Daily Update November 22, 2017

5 Search date (yyyy-mm-dd): 2017-11-24

6

| #  | Searches                                                                                         | Results | Annotations                                                             |
|----|--------------------------------------------------------------------------------------------------|---------|-------------------------------------------------------------------------|
| 1  | haplorhini/                                                                                      | 49334   | #1 - #26:<br>Large animal<br>(MeSH and textual<br>words), engl., german |
| 2  | catarrhini/                                                                                      | 86      |                                                                         |
| 3  | exp cercopithecidae/                                                                             | 124063  |                                                                         |
| 4  | hominidae/                                                                                       | 8135    |                                                                         |
| 5  | gorilla gorilla/                                                                                 | 1997    |                                                                         |
| 6  | pan paniscus/                                                                                    | 530     |                                                                         |
| 7  | pan troglodytes/                                                                                 | 9675    |                                                                         |
| 8  | exp pongo/                                                                                       | 1341    |                                                                         |
| 9  | exp hylobatidae/                                                                                 | 1001    |                                                                         |
| 10 | exp platyrrhini/                                                                                 | 14302   |                                                                         |
| 11 | exp tarsii/                                                                                      | 73      |                                                                         |
| 12 | exp swine/                                                                                       | 215422  |                                                                         |
| 13 | exp sheep/                                                                                       | 119206  |                                                                         |
| 14 | cats/                                                                                            | 141501  |                                                                         |
| 15 | dogs/                                                                                            | 333727  |                                                                         |
| 16 | rabbits/                                                                                         | 355078  |                                                                         |
| 17 | exp goats/                                                                                       | 30832   |                                                                         |
| 18 | horses/                                                                                          | 67796   |                                                                         |
| 19 | cattle/                                                                                          | 348808  |                                                                         |
| 20 | ferrets/                                                                                         | 5813    |                                                                         |
| 21 | guinea pigs/                                                                                     | 148328  |                                                                         |
| 22 | (large animal* or large mammal* or baboon* or<br>beagle* or bovine* or cat or cats or canine* or | 1427622 |                                                                         |

Supplementary Table 1: Search strategy in Medline

- 1 **Web of Science Core Collection:**
- 2 **Science Citation Index Expanded (SCI-EXPANDED):**
- 3
- 4 **2017** (Host: Clarivate Analytics):
- 5 1990 to present (2017-11-22 data last updated).
- 6 Search date: 2017-11-24
- 7

| #  | Searches and annotations                                                                                                                                                                                                                                                                                                                                                                                                                                                                                        | Results |
|----|-----------------------------------------------------------------------------------------------------------------------------------------------------------------------------------------------------------------------------------------------------------------------------------------------------------------------------------------------------------------------------------------------------------------------------------------------------------------------------------------------------------------|---------|
| 38 | #37 OR #36<br>Indexes=SCI-EXPANDED Timespan=1990-2017                                                                                                                                                                                                                                                                                                                                                                                                                                                           | 4,058   |
| 37 | (#35 and ti=(systematic or metaanaly* or metanaly* or "meta-analy*")) AND<br><b>DOCUMENT TYPES:</b> (Review)<br>Indexes=SCI-EXPANDED Timespan=1990-2017                                                                                                                                                                                                                                                                                                                                                         | 3       |
| 36 | #34 OR #33<br><b>Refined by:</b> [excluding] <b>DOCUMENT TYPES:</b> ( EDITORIAL MATERIAL<br>OR ITEM ABOUT AN INDIVIDUAL OR DISCUSSION OR REVIEW OR<br>NOTE OR REPRINT OR NEWS ITEM )<br>Indexes=SCI-EXPANDED Timespan=1990-2017                                                                                                                                                                                                                                                                                 | 4,055   |
| 35 | #34 OR #33<br>Indexes=SCI-EXPANDED Timespan=1990-2017                                                                                                                                                                                                                                                                                                                                                                                                                                                           | 4,334   |
| 34 | (#31) AND <b>LANGUAGE:</b> (English OR German)<br><b>Refined by:</b> <b>RESEARCH AREAS:</b> ( NEUROSCIENCES NEUROLOGY OR<br>CARDIOVASCULAR SYSTEM CARDIOLOGY OR RADIOLOGY<br>NUCLEAR MEDICINE MEDICAL IMAGING OR ENGINEERING OR<br>VETERINARY SCIENCES OR MATERIALS SCIENCE OR SCIENCE<br>TECHNOLOGY OTHER TOPICS OR RESEARCH EXPERIMENTAL<br>MEDICINE OR BIOTECHNOLOGY APPLIED MICROBIOLOGY OR<br>EMERGENCY MEDICINE OR LIFE SCIENCES BIOMEDICINE OTHER<br>TOPICS )<br>Indexes=SCI-EXPANDED Timespan=1990-2017 | 4,083   |

Supplementary Table 2: Search strategy in Web of Science

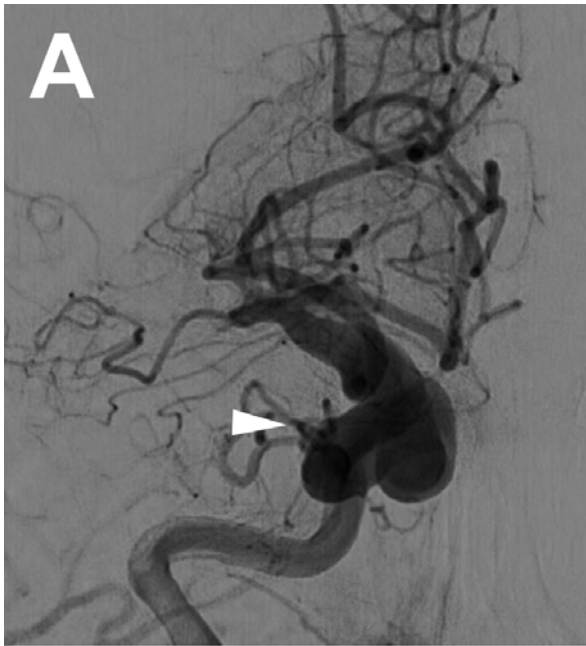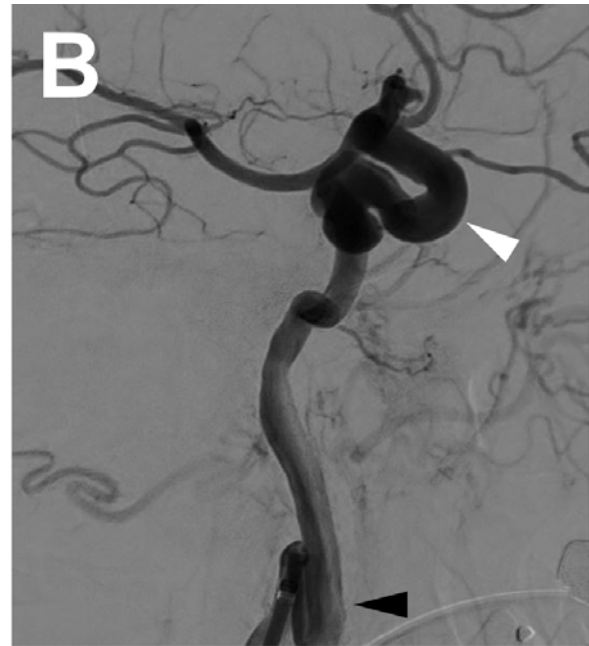

Supplementary Figure 1: DSA carotid siphon

DSA from mechanical thrombectomy procedure in elderly patient with acute MCA occlusion showing an extremely elongated carotid siphon (white arrows) in AP and lateral view. See additional tortuosity of cervical ICA (black arrow in B) making endovascular access challenging.
